# Supplementary material
Source: PubMed Central journal article supplement (PMC9988846)
Supplement: 41746_2023_778_MOESM1_ESM.pdf [file 41746_2023_778_MOESM1_ESM.pdf]

## Supplementary Information

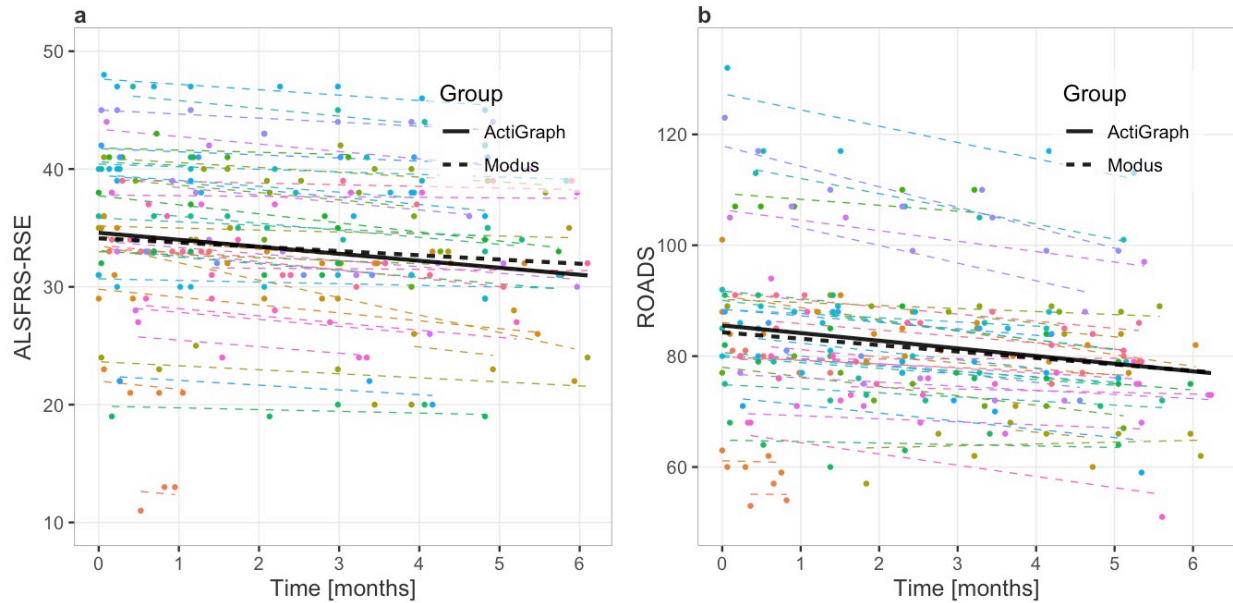

Supplementary Figure 1. **Estimated survey baseline and change over time across groups by wearable device (ActiGraph, Modus).** **a** Self-entry Amyotrophic Lateral Sclerosis Functional Rating Scale-Revised (ALSFRS-RSE). **b** Rasch-built Overall ALS Disability Scale (ROADS). Participants are color coded and the color scheme is maintained across plots: lines represent participant-specific conditional means, points represent observed values. The thick black lines in **a**, **b** represent the population mean by wearable device: ActiGraph (solid line), Modus (dashed line).

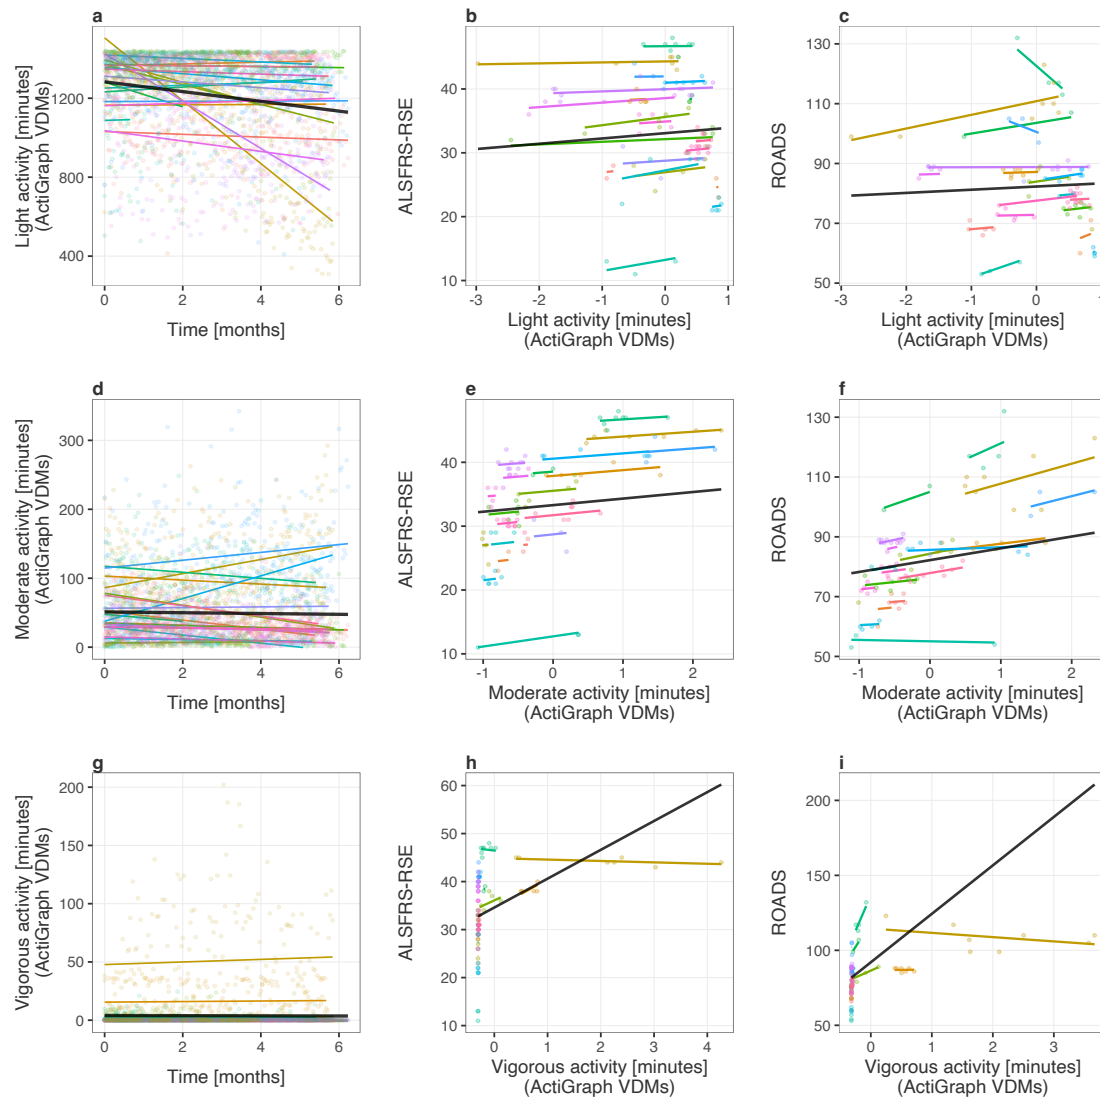

Supplementary Figure 2. **Wearable physical activity daily measure change over time and their association with the self-entry amyotrophic lateral sclerosis (ALS) functional rating scale-revised (ALSFRS-RSE) and the Rasch-built Overall ALS disability Scale (ROADS).** Three different daily measures are represented in the figure, one per row. Column 1 (a, d, g) - baseline and monthly change in the daily measure. Column 2 (b, e, h) - daily measure association with ALSFRS-RSE total score. Column 3 (c, f, i) - daily measure association with the ROADS total score. The slopes in columns 2 and 3 represent the effect estimates for daily measures, standardized to have 0 means and unit standard deviations. In each plot, colored lines represent participant conditional mean values, and the color scheme is maintained across plots. Black lines represent population mean values.

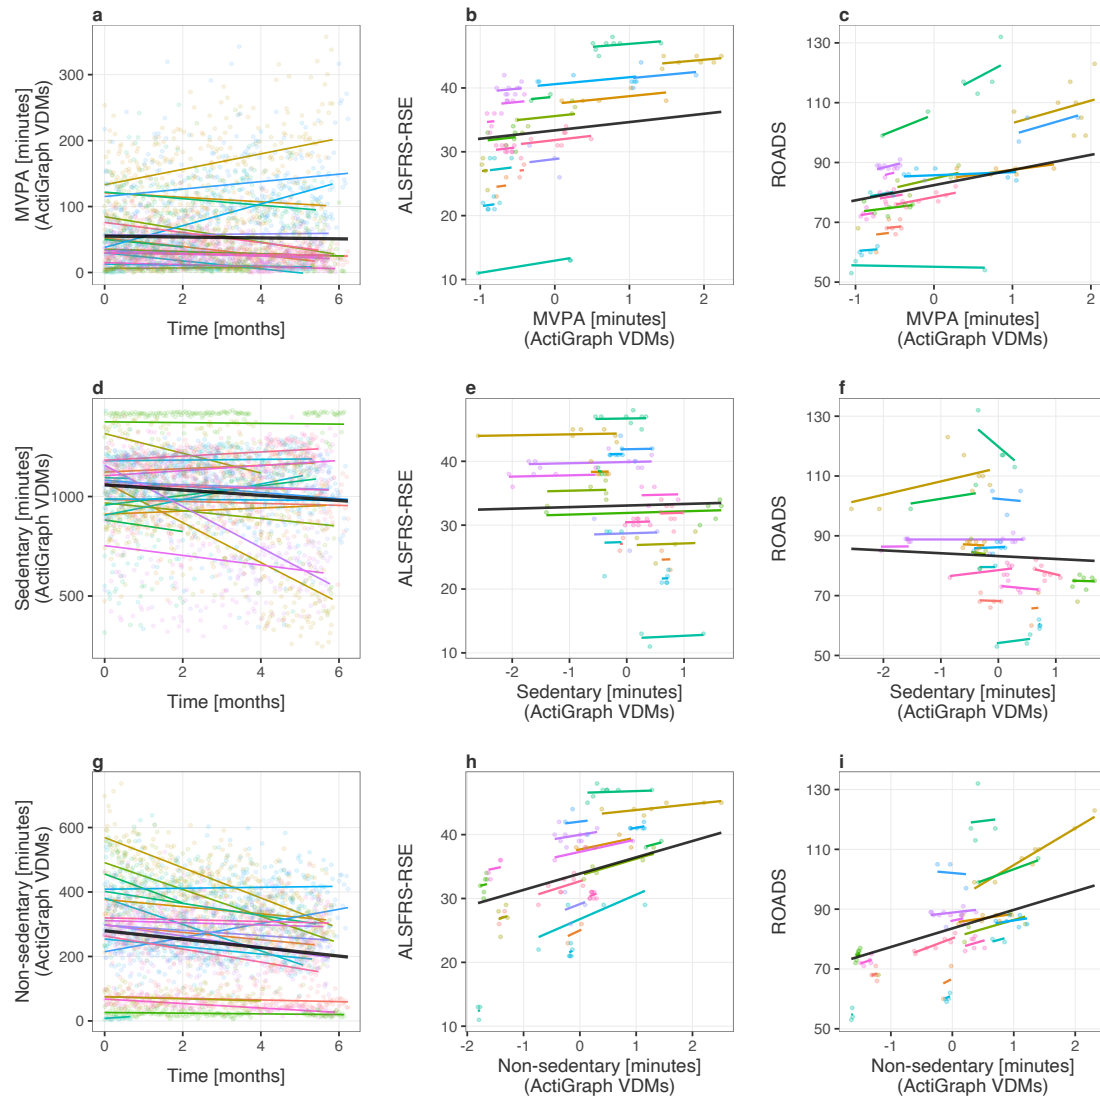

**Supplementary Figure 3. Wearable physical activity daily measure change over time and their association with the self-entry amyotrophic lateral sclerosis (ALS) functional rating scale-revised (ALSFRS-RSE) and the Rasch-built Overall ALS disability Scale (ROADS).** Three different daily measures are represented in the figure, one per row. Column 1 (a, d, g) - baseline and monthly change in the daily measure. Column 2 (b, e, h) - daily measure association with ALSFRS-RSE total score. Column 3 (c, f, i) - daily measure association with the ROADS total score. The slopes in columns 2 and 3 represent the effect estimates for daily measures, standardized to have 0 means and unit standard deviations. In each plot, colored lines represent participant conditional mean values, and the color scheme is maintained across plots. Black lines represent population mean values.

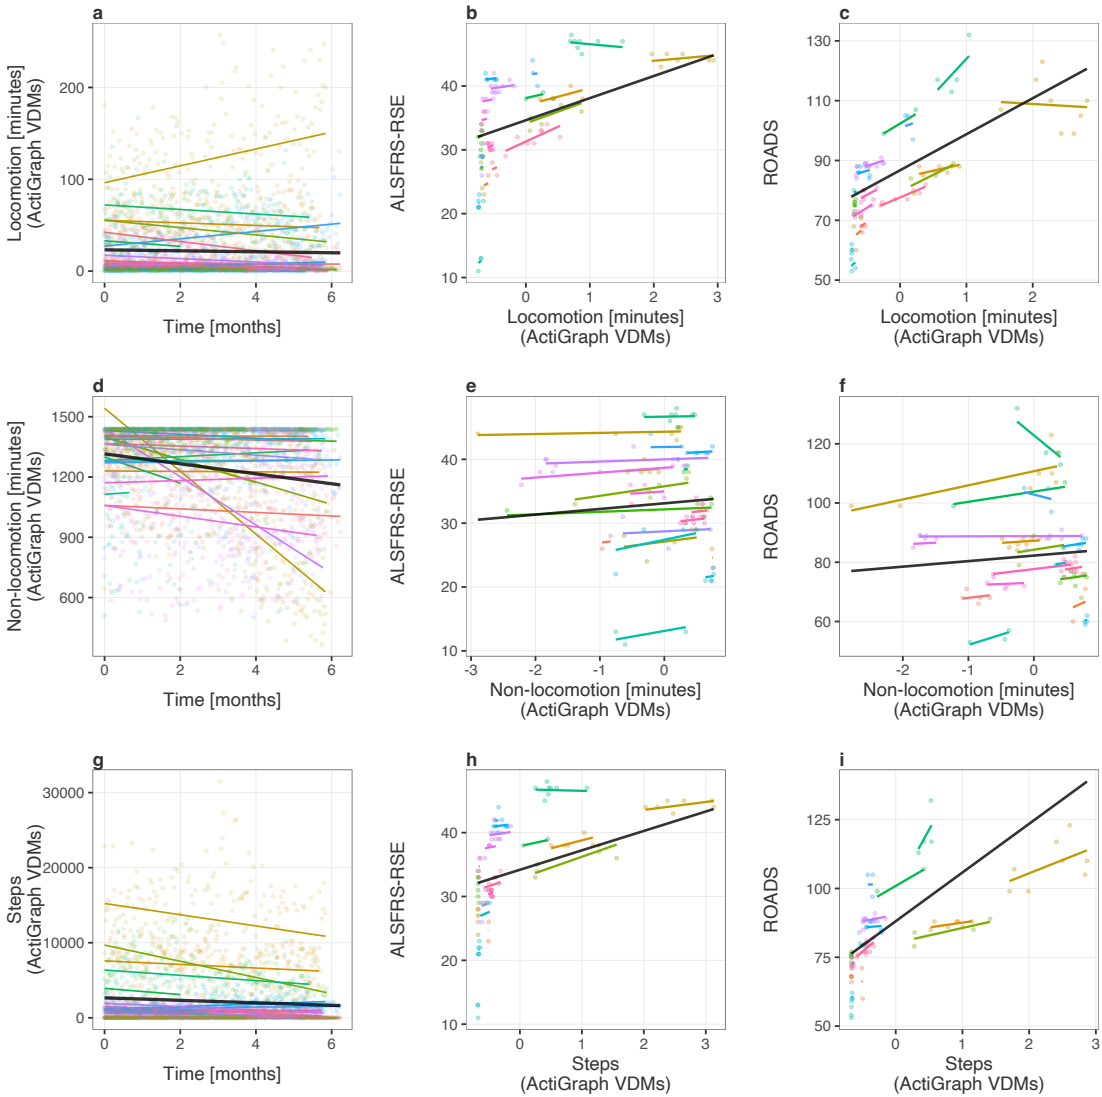

Supplementary Figure 4. **Wearable physical activity daily measure change over time and their association with the self-entry amyotrophic lateral sclerosis (ALS) functional rating scale-revised (ALSFRS-RSE) and the Rasch-built Overall ALS disability Scale (ROADS).** Three different daily measures are represented in the figure, one per row. Column 1 (a, d, g) - baseline and monthly change in the daily measure. Column 2 (b, e, h) - daily measure association with ALSFRS-RSE total score. Column 3 (c, f, i) - daily measure association with the ROADS total score. The slopes in columns 2 and 3 represent the effect estimates for daily measures, standardized to have 0 means and unit standard deviations. In each plot, colored lines represent participant conditional mean values, and the color scheme is maintained across plots. Black lines represent population mean values.

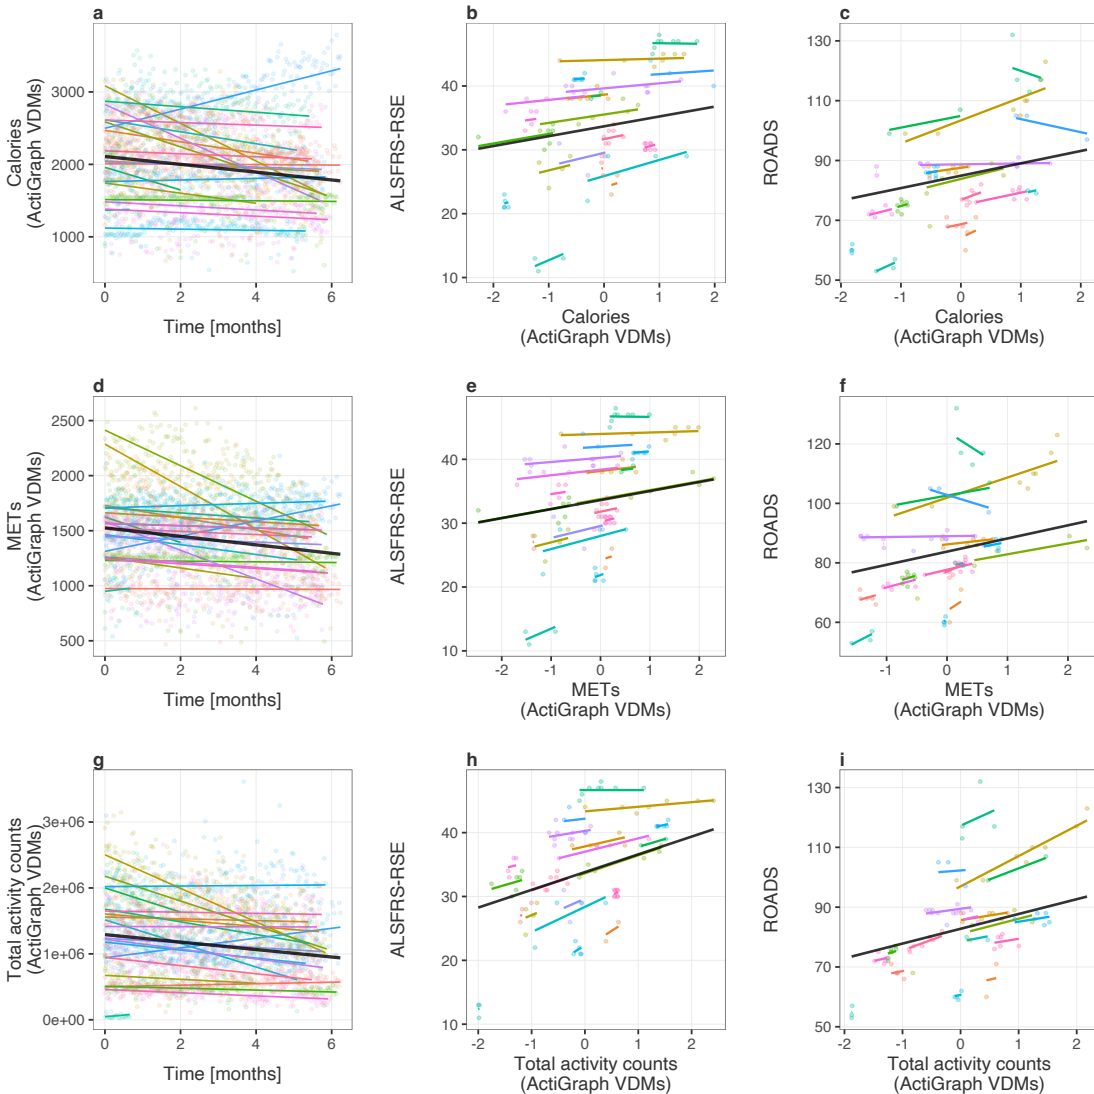

**Supplementary Figure 5. Wearable physical activity daily measure change over time and their association with the self-entry amyotrophic lateral sclerosis (ALS) functional rating scale-revised (ALSFRS-RSE) and the Rasch-built Overall ALS disability Scale (ROADS).** Three different daily measures are represented in the figure, one per row. Column 1 (**a**, **d**, **g**) - baseline and monthly change in the daily measure. Column 2 (**b**, **e**, **h**) - daily measure association with ALSFRS-RSE total score. Column 3 (**c**, **f**, **i**) - daily measure association with the ROADS total score. The slopes in columns 2 and 3 represent the effect estimates for daily measures, standardized to have 0 means and unit standard deviations. In each plot, colored lines represent participant conditional mean values, and the color scheme is maintained across plots. Black lines represent population mean values.

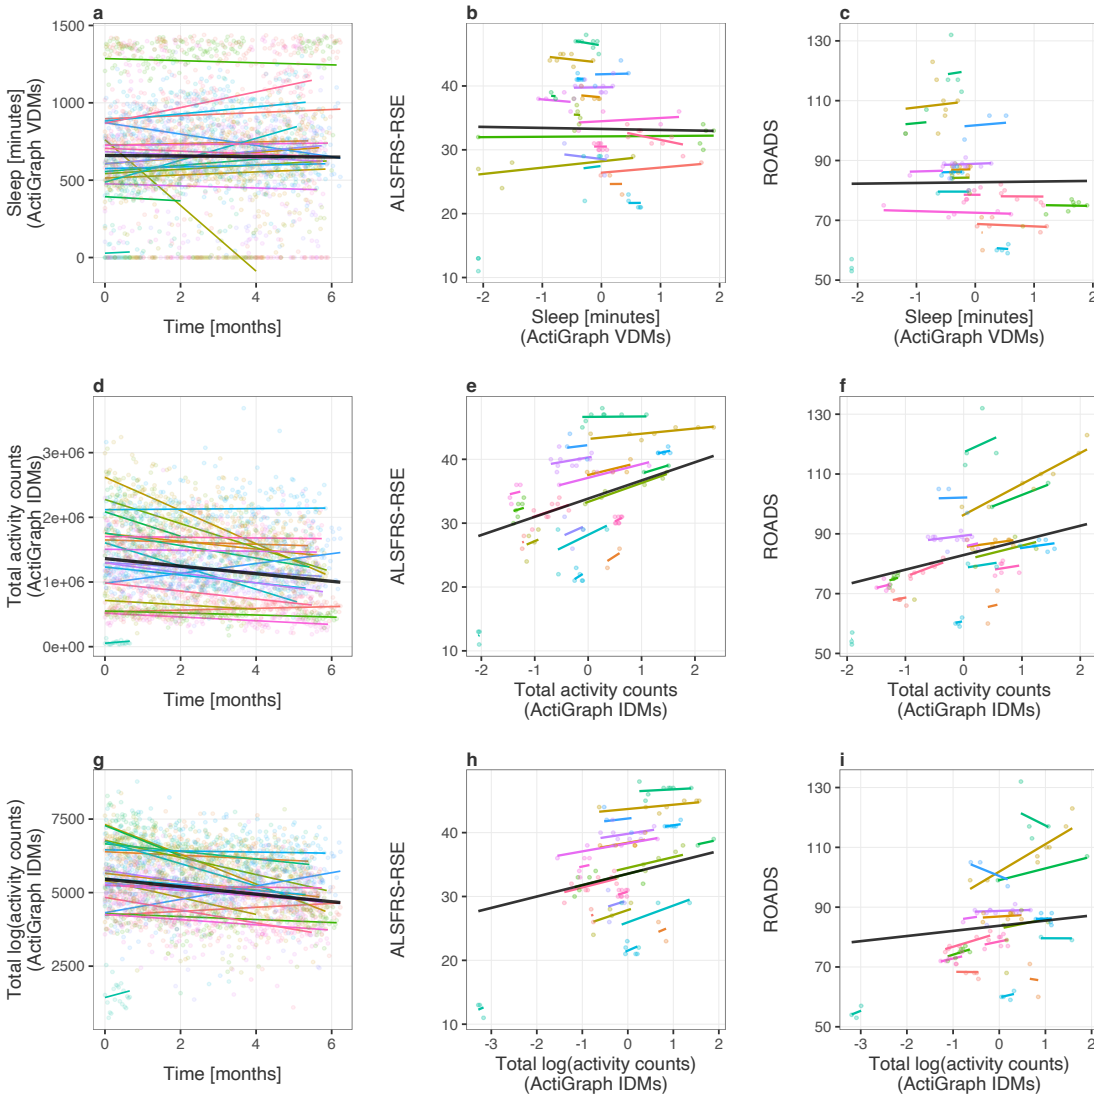

Supplementary Figure 6. **Wearable physical activity daily measure change over time and their association with the self-entry amyotrophic lateral sclerosis (ALS) functional rating scale-revised (ALSFRS-RSE) and the Rasch-built Overall ALS disability Scale (ROADS).** Three different daily measures are represented in the figure, one per row. Column 1 (**a, d, g**) - baseline and monthly change in the daily measure. Column 2 (**b, e, h**) - daily measure association with ALSFRS-RSE total score. Column 3 (**c, f, i**) - daily measure association with the ROADS total score. The slopes in columns 2 and 3 represent the effect estimates for daily measures, standardized to have 0 means and unit standard deviations. In each plot, colored lines represent participant conditional mean values, and the color scheme is maintained across plots. Black lines represent population mean values.

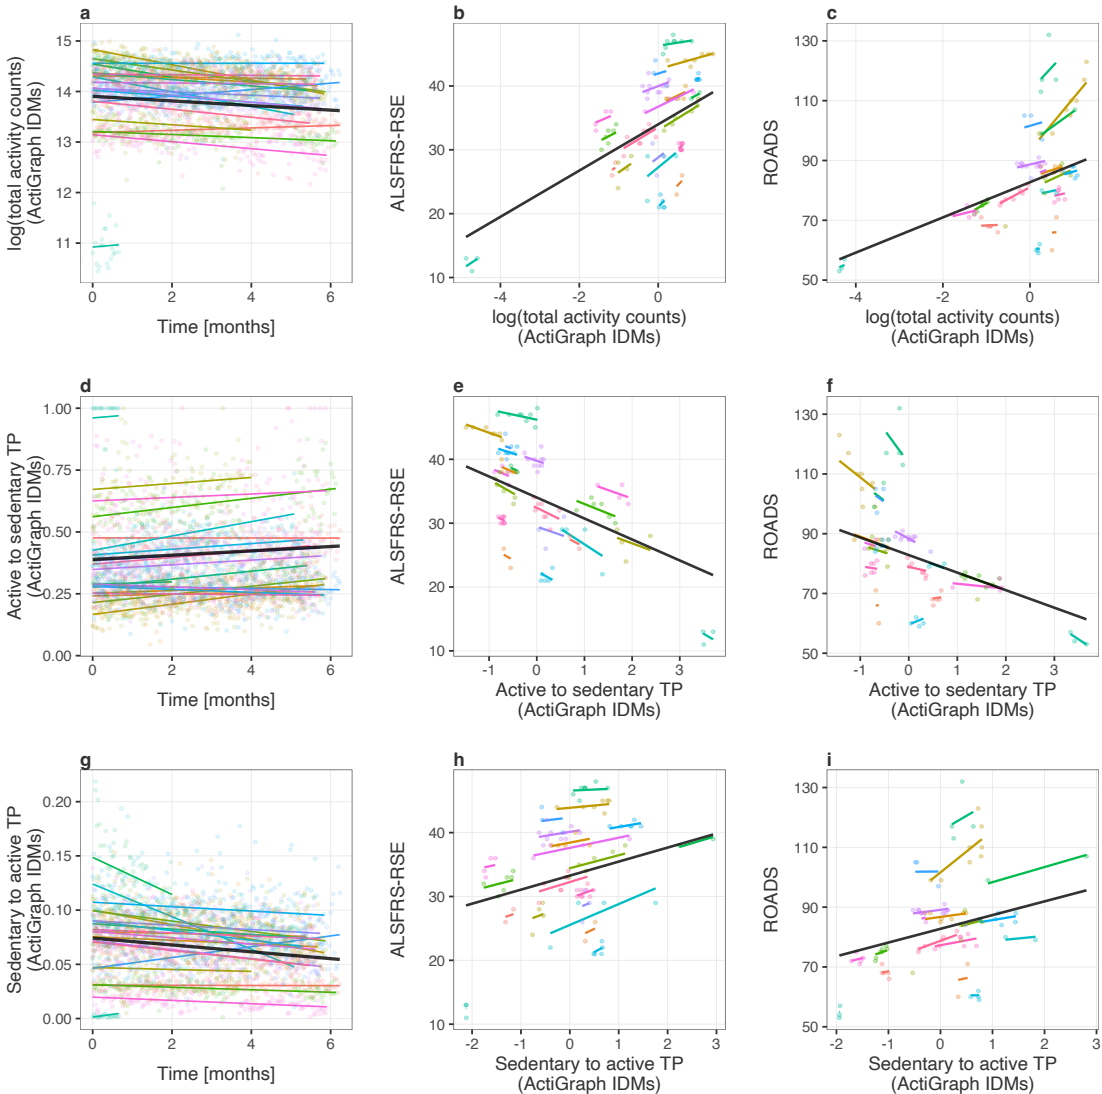

**Supplementary Figure 7. Wearable physical activity daily measure change over time and their association with the self-entry amyotrophic lateral sclerosis (ALS) functional rating scale-revised (ALSFRS-RSE) and the Rasch-built Overall ALS disability Scale (ROADS).** Three different daily measures are represented in the figure, one per row. Column 1 (a, d, g) - baseline and monthly change in the daily measure. Column 2 (b, e, h) - daily measure association with ALSFRS-RSE total score. Column 3 (c, f, i) - daily measure association with the ROADS total score. The slopes in columns 2 and 3 represent the effect estimates for daily measures, standardized to have 0 means and unit standard deviations. In each plot, colored lines represent participant conditional mean values, and the color scheme is maintained across plots. Black lines represent population mean values.

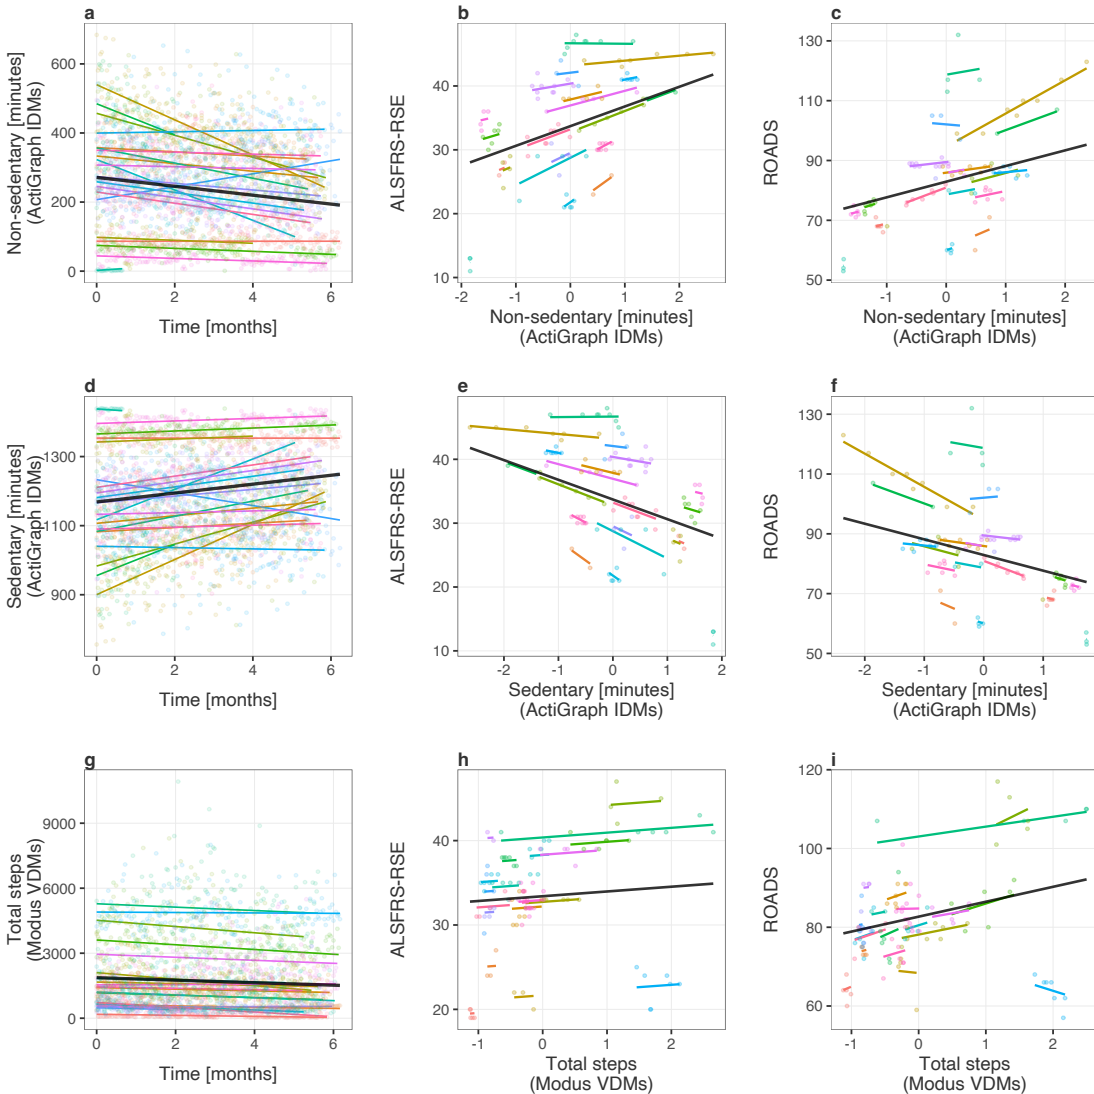

Supplementary Figure 8. **Wearable physical activity daily measure change over time and their association with the self-entry amyotrophic lateral sclerosis (ALS) functional rating scale-revised (ALSFRS-RSE) and the Rasch-built Overall ALS disability Scale (ROADS).** Three different daily measures are represented in the figure, one per row. Column 1 (a, d, g) - baseline and monthly change in the daily measure. Column 2 (b, e, h) - daily measure association with ALSFRS-RSE total score. Column 3 (c, f, i) - daily measure association with the ROADS total score. The slopes in columns 2 and 3 represent the effect estimates for daily measures, standardized to have 0 means and unit standard deviations. In each plot, colored lines represent participant conditional mean values, and the color scheme is maintained across plots. Black lines represent population mean values.



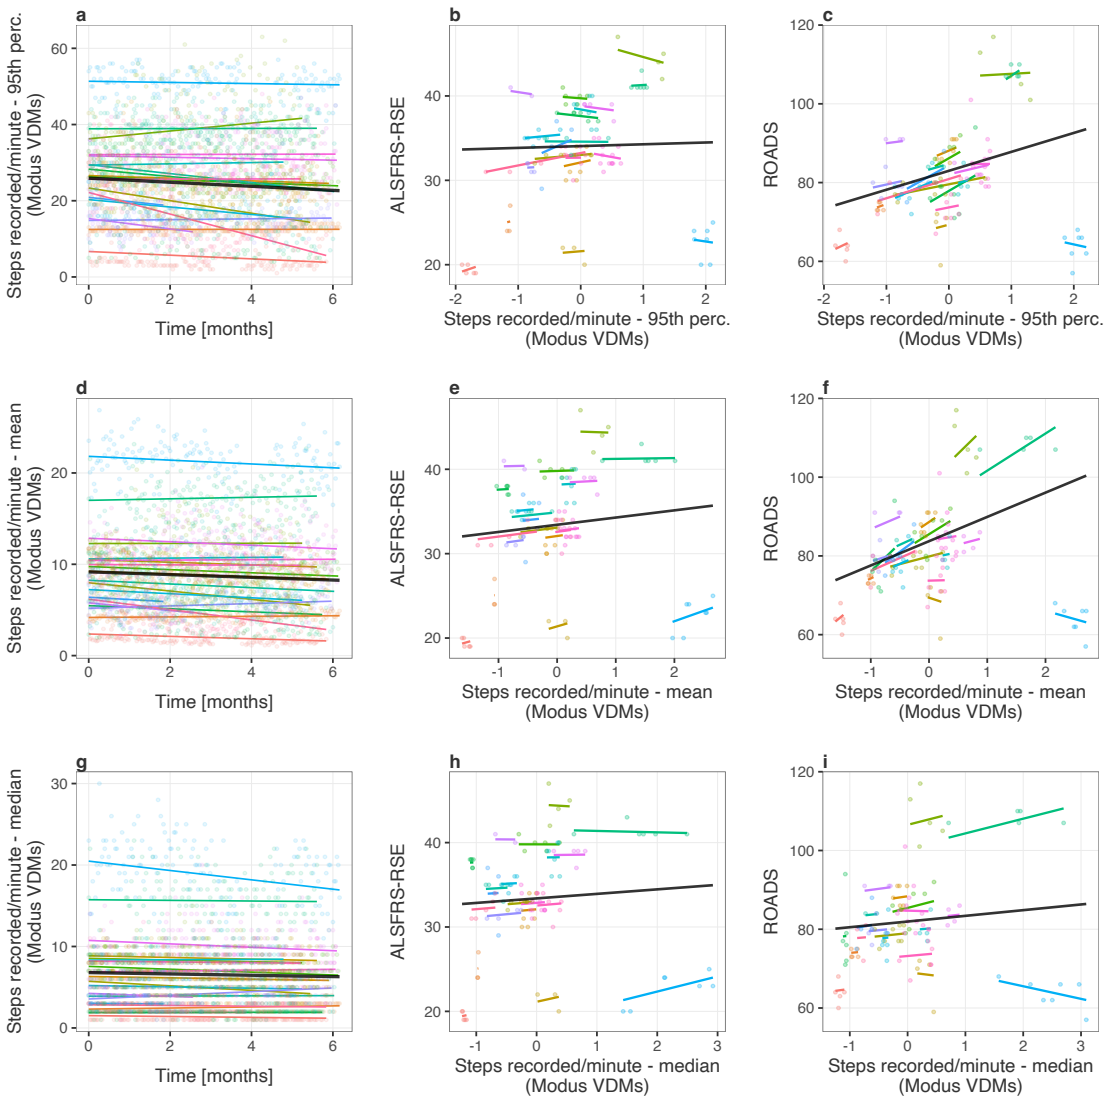

Supplementary Figure 9. **Wearable physical activity daily measure change over time and their association with the self-entry amyotrophic lateral sclerosis (ALS) functional rating scale-revised (ALSFRS-RSE) and the Rasch-built Overall ALS disability Scale (ROADS).** Three different daily measures are represented in the figure, one per row. Column 1 (a, d, g) - baseline and monthly change in the daily measure. Column 2 (b, e, h) - daily measure association with ALSFRS-RSE total score. Column 3 (c, f, i) - daily measure association with the ROADS total score. The slopes in columns 2 and 3 represent the effect estimates for daily measures, standardized to have 0 means and unit standard deviations. In each plot, colored lines represent participant conditional mean values, and the color scheme is maintained across plots. Black lines represent population mean values.

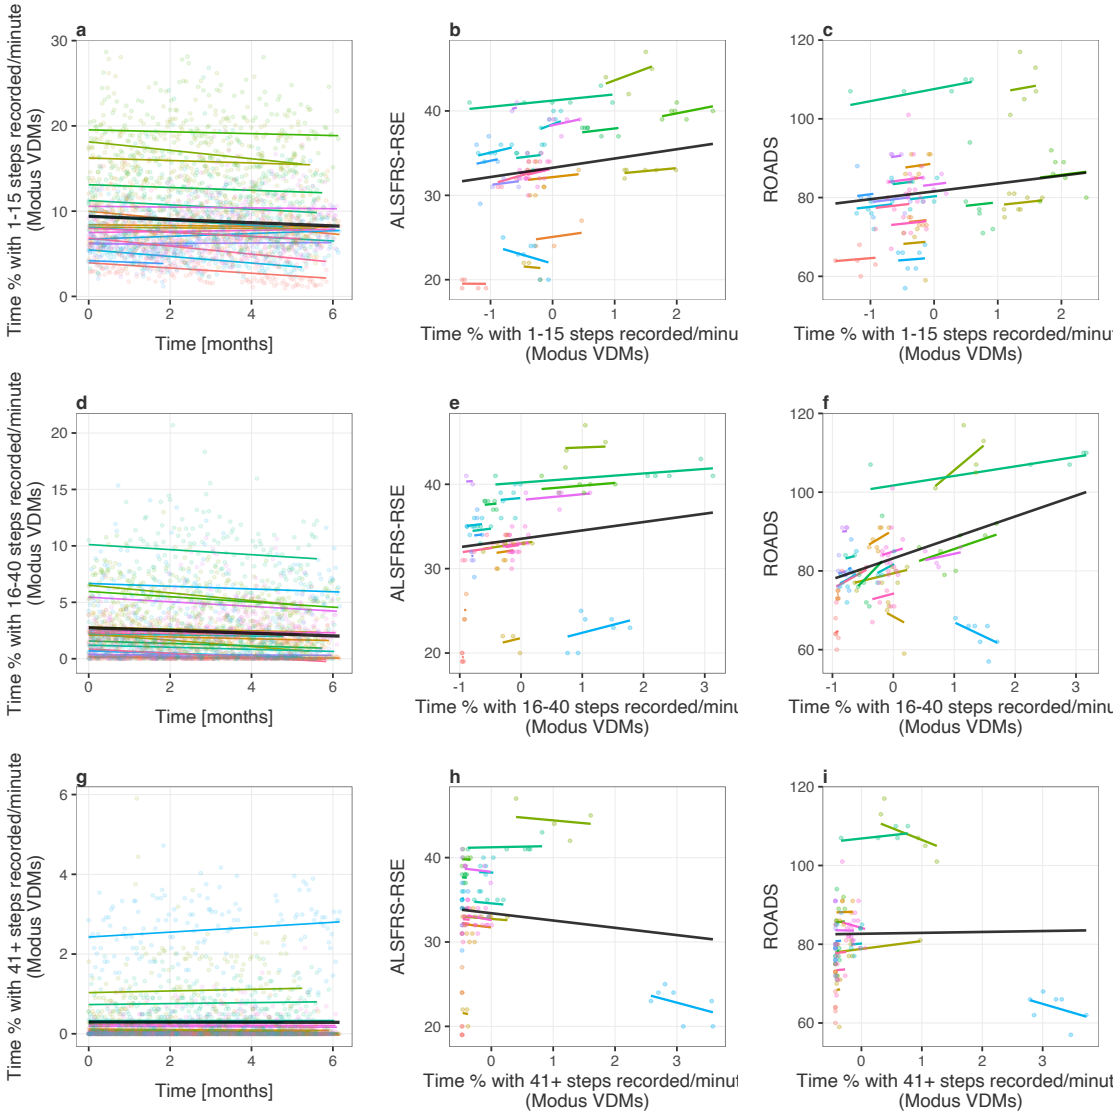

**Supplementary Figure 10. Wearable physical activity daily measure change over time and their association with the self-entry amyotrophic lateral sclerosis (ALS) functional rating scale-revised (ALSFRS-RSE) and the Rasch-built Overall ALS disability Scale (ROADS).** Three different daily measures are represented in the figure, one per row. Column 1 (a, d, g) - baseline and monthly change in the daily measure. Column 2 (b, e, h) - daily measure association with ALSFRS-RSE total score. Column 3 (c, f, i) - daily measure association with the ROADS total score. The slopes in columns 2 and 3 represent the effect estimates for daily measures, standardized to have 0 means and unit standard deviations. In each plot, colored lines represent participant conditional mean values, and the color scheme is maintained across plots. Black lines represent population mean values.

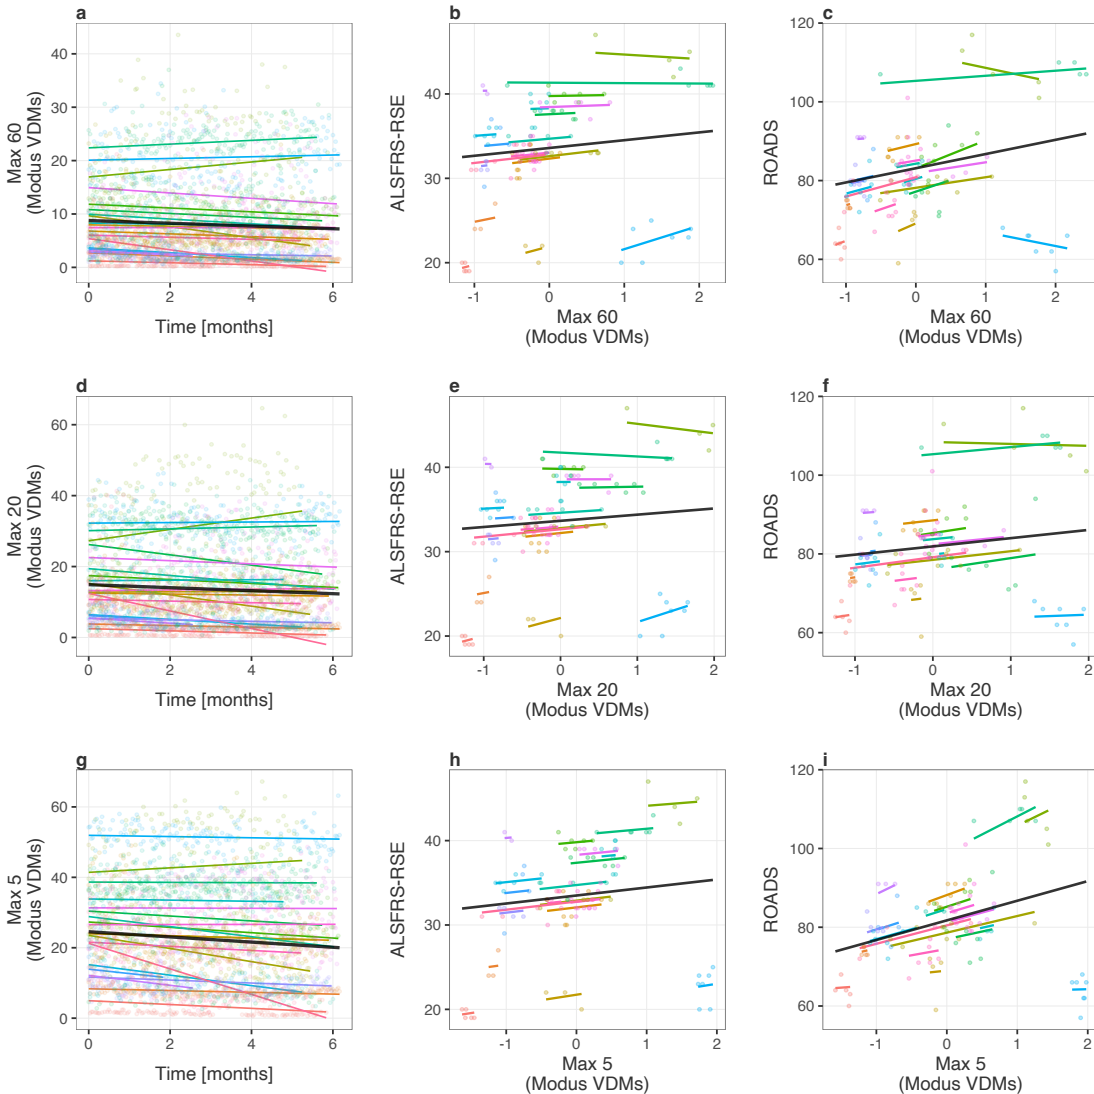

**Supplementary Figure 11. Wearable physical activity daily measure change over time and their association with the self-entry amyotrophic lateral sclerosis (ALS) functional rating scale-revised (ALSFRS-RSE) and the Rasch-built Overall ALS disability Scale (ROADS).** Three different daily measures are represented in the figure, one per row. Column 1 (**a, d, g**) - baseline and monthly change in the daily measure. Column 2 (**b, e, h**) - daily measure association with ALSFRS-RSE total score. Column 3 (**c, f, i**) - daily measure association with the ROADS total score. The slopes in columns 2 and 3 represent the effect estimates for daily measures, standardized to have 0 means and unit standard deviations. In each plot, colored lines represent participant conditional mean values, and the color scheme is maintained across plots. Black lines represent population mean values.

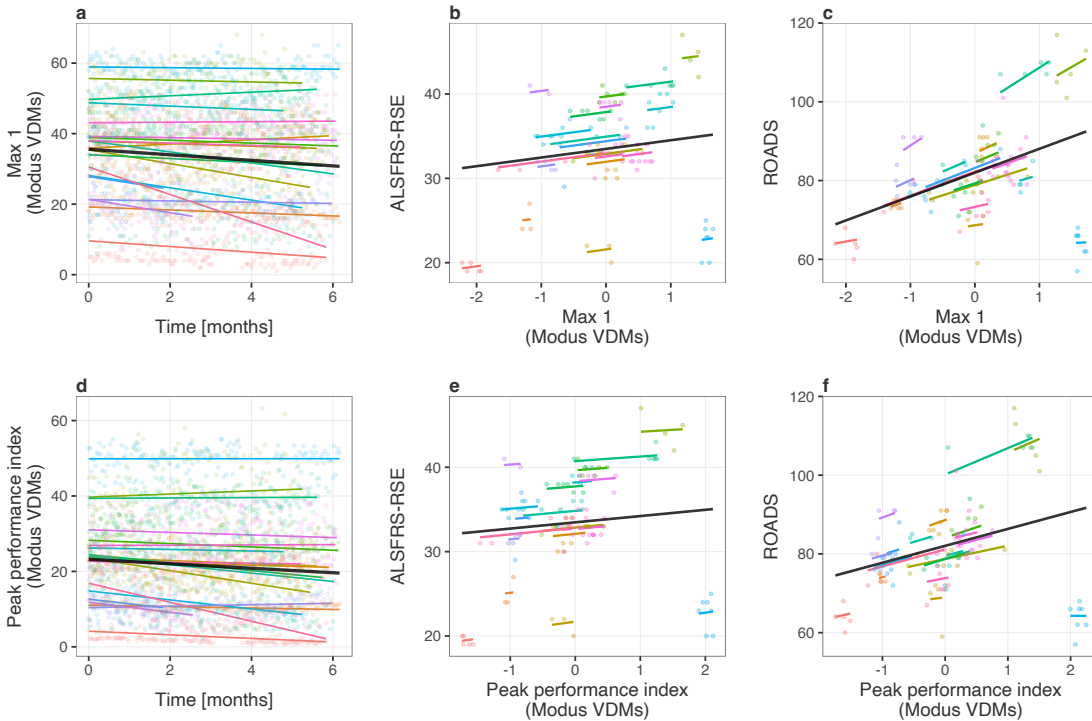

Supplementary Figure 12. **Wearable physical activity daily measure change over time and their association with the self-entry amyotrophic lateral sclerosis (ALS) functional rating scale-revised (ALSFRS-RSE) and the Rasch-built overall ALS disability Scale (ROADS).** Two different daily measures are represented in the figure, one per row. Column 1 (a, d) - baseline and monthly change in the daily measure. Column 2 (b, e) - daily measure association with ALSFRS-RSE total score. Column 3 (c, f) - daily measure association with the ROADS total score. The slopes in columns 2 and 3 represent the effect estimates for daily measures, standardized to have 0 means and unit standard deviations. In each plot, colored lines represent participant conditional mean values, and the color scheme is maintained across plots. Black lines represent population mean values.

### Supplementary Table 1

LMMs quantifying population average baselines and monthly change in ALSFRS-RSE, ALSFRS-R and ROADS.

| Model | Outcome                | Term                    | Term est. [95% CI] (p-val.)     | R2m   | R2c.  |
|-------|------------------------|-------------------------|---------------------------------|-------|-------|
| 1     | ALSFRS-RSE             | Intercept               | 34.346 [31.950, 36.736] (0.000) | 0.013 | 0.98  |
|       |                        | Time                    | -0.475 [-0.627, -0.325] (0.000) |       |       |
| 2     | ROADS                  | Intercept               | 84.906 [79.904, 89.896] (0.000) | 0.025 | 0.954 |
|       |                        | Time [months]           | -1.260 [-1.712, -0.806] (0.000) |       |       |
| 3     | ALSFRS-R               | Intercept               | 31.576 [29.112, 34.039] (0.000) | 0.014 | 0.942 |
|       |                        | Time [months]           | -0.369 [-0.623, -0.113] (0.007) |       |       |
| 4     | (ALSFRS-RSE, ALSFRS-R) | Intercept               | 34.422 [32.033, 36.808] (0.000) | 0.046 | 0.957 |
|       |                        | Time [months]           | -0.473 [-0.702, -0.247] (0.000) |       |       |
|       |                        | in-clinic               | -2.866 [-3.470, -2.257] (0.000) |       |       |
|       |                        | Time [months]:in-clinic | 0.057 [-0.122, 0.234] (0.535)   |       |       |
| 5     | ALSFRS-RSE             | Intercept               | 34.597 [31.219, 37.961] (0.000) | 0.013 | 0.981 |
|       |                        | Time [months]           | -0.595 [-0.805, -0.388] (0.000) |       |       |
|       |                        | Modus                   | -0.484 [-5.241, 4.287] (0.844)  |       |       |
|       |                        | Time [months]:Modus     | 0.236 [-0.054, 0.528] (0.115)   |       |       |
| 6     | ROADS                  | Intercept               | 85.547 [78.453, 92.583] (0.000) | 0.025 | 0.956 |
|       |                        | Time [months]           | -1.381 [-2.035, -0.710] (0.000) |       |       |
|       |                        | Modus                   | -1.246 [-11.191, 8.766] (0.808) |       |       |
|       |                        | Time [months]:Modus     | 0.223 [-0.701, 1.122] (0.632)   |       |       |

ALSFRS-R -- staff-administered amyotrophic lateral sclerosis functional rating scale-revised; ALSFRS-RSE -- self-entry ALSFRS-R; CI -- estimate's confidence interval obtained from LMM estimation; est. -- estimate obtained from LMM estimation; LMM -- mixed effects model; Mod. no. -- LMM model number; R2c -- LMM conditional coefficient of determination; R2m -- LMM marginal coefficient of determination; p.-val. -- estimate's p-value obtained from LMM estimation; ROADS -- Rasch-built Overall ALS Disability Scale

## Supplementary Table 2

### Association between wearable-derived daily PA measures and ALSFRS-RSE total score

| Model no. | Device group | Data set | Daily measure                           | Slope est.* [95% CI] (p-val.)   | R2m   | R2c   |
|-----------|--------------|----------|-----------------------------------------|---------------------------------|-------|-------|
| 1         | AG           | VDMs     | Light activity [minutes]                | 0.828 [-1.119, 2.775] (0.178)   | 0.006 | 0.975 |
| 2         | AG           | VDMs     | Moderate activity [minutes]             | 1.028 [0.254, 1.802] (0.010)    | 0.011 | 0.97  |
| 3         | AG           | VDMs     | Vigorous activity [minutes]             | 6.009 [3.433, 8.585] (0.002)    | 0.226 | 0.976 |
| 4         | AG           | VDMs     | MVPA [minutes]                          | 1.302 [0.319, 2.285] (0.010)    | 0.018 | 0.969 |
| 5         | AG           | VDMs     | Sedentary [minutes]                     | 0.246 [-0.333, 0.824] (0.400)   | 0.001 | 0.972 |
| 6         | AG           | VDMs     | Non-sedentary [minutes]                 | 2.553 [1.687, 3.420] (0.000)    | 0.103 | 0.974 |
| 7         | AG           | VDMs     | Locomotion [minutes]                    | 3.462 [2.237, 4.687] (0.000)    | 0.148 | 0.969 |
| 8         | AG           | VDMs     | Non-locomotion [minutes]                | 0.886 [-0.409, 2.181] (0.114)   | 0.006 | 0.976 |
| 9         | AG           | VDMs     | Steps                                   | 3.040 [1.950, 4.130] (0.000)    | 0.123 | 0.970 |
| 10        | AG           | VDMs     | Calories                                | 1.543 [0.774, 2.313] (0.000)    | 0.032 | 0.973 |
| 11        | AG           | VDMs     | METs                                    | 1.414 [0.744, 2.083] (0.000)    | 0.025 | 0.972 |
| 12        | AG           | VDMs     | Total activity counts                   | 2.778 [1.837, 3.720] (0.000)    | 0.116 | 0.976 |
| 13        | AG           | VDMs     | Sleep [minutes]                         | -0.159 [-3.577, 3.259] (0.831)  | 0.000 | 0.970 |
| 14        | AG           | IDMs     | Total activity counts                   | 2.850 [1.883, 3.817] (0.000)    | 0.124 | 0.974 |
| 15        | AG           | IDMs     | Total log(activity counts)              | 1.784 [1.028, 2.541] (0.000)    | 0.047 | 0.971 |
| 16        | AG           | IDMs     | log(total activity counts)              | 3.621 [2.386, 4.857] (0.000)    | 0.237 | 0.977 |
| 17        | AG           | IDMs     | Active to sedentary TP                  | -3.286 [-5.036, -1.536] (0.003) | 0.198 | 0.971 |
| 18        | AG           | IDMs     | Sedentary to active TP                  | 2.197 [1.293, 3.100] (0.000)    | 0.061 | 0.977 |
| 19        | AG           | IDMs     | Non-sedentary [minutes]                 | 3.082 [2.042, 4.121] (0.000)    | 0.134 | 0.977 |
| 20        | AG           | IDMs     | Sedentary [minutes]                     | -3.082 [-4.121, -2.042] (0.000) | 0.134 | 0.977 |
| 21        | M            | VDMs     | Total steps                             | 0.564 [-0.315, 1.443] (0.201)   | 0.005 | 0.958 |
| 22        | M            | VDMs     | Steps recorded/minute - 95th perc.      | 0.213 [-1.832, 2.258] (0.810)   | 0.001 | 0.961 |
| 23        | M            | VDMs     | Steps recorded/minute - mean            | 0.854 [-0.431, 2.139] (0.191)   | 0.011 | 0.964 |
| 24        | M            | VDMs     | Steps recorded/minute - median          | 0.536 [-0.438, 1.511] (0.277)   | 0.005 | 0.964 |
| 25        | M            | VDMs     | Time % with 1-15 steps recorded/minute  | 1.097 [-0.522, 2.716] (0.159)   | 0.018 | 0.964 |
| 26        | M            | VDMs     | Time % with 16-40 steps recorded/minute | 0.993 [0.274, 1.711] (0.007)    | 0.016 | 0.960 |
| 27        | M            | VDMs     | Time % with 41+ steps recorded/minute   | -0.863 [-3.117, 1.390] (0.363)  | 0.012 | 0.961 |
| 28        | M            | VDMs     | Max 60                                  | 0.923 [0.137, 1.709] (0.022)    | 0.011 | 0.964 |
| 29        | M            | VDMs     | Max 20                                  | 0.731 [-0.252, 1.715] (0.142)   | 0.007 | 0.964 |
| 30        | M            | VDMs     | Max 5                                   | 0.949 [-0.149, 2.048] (0.090)   | 0.013 | 0.958 |
| 31        | M            | VDMs     | Max 1                                   | 1.025 [-0.008, 2.058] (0.052)   | 0.017 | 0.957 |
| 32        | M            | VDMs     | Peak performance index                  | 0.741 [-0.384, 1.866] (0.195)   | 0.009 | 0.958 |

AG -- ActiGraph device; ALSFRS-RSE -- self-entry amyotrophic lateral sclerosis functional rating scale-revised; IDMs -- investigator-derived daily measures; CI -- estimate's confidence interval obtained from LMM estimation; est. -- estimate obtained from LMM estimation; Model no. -- model number: ordering index of a LMM fit, assigned to a particular daily measure; R2c -- LMM conditional coefficient of determination; R2m -- LMM marginal coefficient of determination; M -- Modus device; Max (60,20,5,1) -- maximum consecutive cadence during (60,20,5,1) minutes; PA -- physical activity; PPI -- peak performance index (mean cadence of the day's most intensive, non-contiguous 30 minutes); VDMs -- vendor-provided daily measures

\* Daily measure slopes have been standardized to have means of zero and units in standard deviations.

### Supplementary Table 3

#### Association between wearable-derived daily PA measures and ROADS score.

| Model no. | Device group | Data set | Daily measure                           | Slope est.* [95% CI] (p-val.)   | R2m   | R2c   |
|-----------|--------------|----------|-----------------------------------------|---------------------------------|-------|-------|
| 1         | AG           | VDMs     | Light activity [minutes]                | 1.066 [-4.157, 6.288] (0.663)   | 0.002 | 0.977 |
| 2         | AG           | VDMs     | Moderate activity [minutes]             | 3.947 [0.214, 7.680] (0.041)    | 0.044 | 0.947 |
| 3         | AG           | VDMs     | Vigorous activity [minutes]             | 32.32 [-28.05, 92.68] (0.211)   | 0.269 | 0.995 |
| 4         | AG           | VDMs     | MVPA [minutes]                          | 5.074 [0.469, 9.680] (0.035)    | 0.077 | 0.944 |
| 5         | AG           | VDMs     | Sedentary [minutes]                     | -0.954 [-6.155, 4.247] (0.690)  | 0.002 | 0.968 |
| 6         | AG           | VDMs     | Non-sedentary [minutes]                 | 6.202 [1.932, 10.47] (0.009)    | 0.145 | 0.969 |
| 7         | AG           | VDMs     | Locomotion [minutes]                    | 12.04 [4.131, 19.94] (0.007)    | 0.346 | 0.963 |
| 8         | AG           | VDMs     | Non-locomotion [minutes]                | 1.869 [-3.376, 7.114] (0.447)   | 0.006 | 0.978 |
| 9         | AG           | VDMs     | Steps                                   | 17.70 [4.817, 30.59] (0.013)    | 0.447 | 0.980 |
| 10        | AG           | VDMs     | Calories                                | 4.138 [0.053, 8.223] (0.048)    | 0.047 | 0.974 |
| 11        | AG           | VDMs     | METs                                    | 4.422 [-0.518, 9.363] (0.072)   | 0.049 | 0.973 |
| 12        | AG           | VDMs     | Total activity counts                   | 4.945 [1.081, 8.809] (0.018)    | 0.092 | 0.967 |
| 13        | AG           | VDMs     | Sleep [minutes]                         | 0.233 [-2.664, 3.130] (0.872)   | 0.000 | 0.952 |
| 14        | AG           | IDMs     | Total activity counts                   | 4.891 [0.899, 8.883] (0.021)    | 0.092 | 0.966 |
| 15        | AG           | IDMs     | Total log(activity counts)              | 1.720 [-2.231, 5.671] (0.360)   | 0.009 | 0.972 |
| 16        | AG           | IDMs     | log(total activity counts)              | 5.888 [1.065, 10.71] (0.021)    | 0.157 | 0.967 |
| 17        | AG           | IDMs     | Active to sedentary TP                  | -5.872 [-9.531, -2.214] (0.004) | 0.150 | 0.948 |
| 18        | AG           | IDMs     | Sedentary to active TP                  | 4.588 [0.128, 9.048] (0.045)    | 0.070 | 0.957 |
| 19        | AG           | IDMs     | Non-sedentary [minutes]                 | 5.235 [1.275, 9.195] (0.014)    | 0.101 | 0.969 |
| 20        | AG           | IDMs     | Sedentary [minutes]                     | -5.235 [-9.195, -1.275] (0.014) | 0.101 | 0.969 |
| 21        | M            | VDMs     | Total steps                             | 3.791 [-2.403, 9.985] (0.188)   | 0.083 | 0.869 |
| 22        | M            | VDMs     | Steps recorded/minute - 95th perc.      | 4.810 [-0.445, 10.07] (0.068)   | 0.113 | 0.877 |
| 23        | M            | VDMs     | Steps recorded/minute - mean            | 6.167 [0.719, 11.61] (0.030)    | 0.195 | 0.883 |
| 24        | M            | VDMs     | Steps recorded/minute - median          | 1.445 [-3.753, 6.643] (0.536)   | 0.013 | 0.856 |
| 25        | M            | VDMs     | Time % with 1-15 steps recorded/minute  | 1.992 [-1.330, 5.314] (0.236)   | 0.022 | 0.860 |
| 26        | M            | VDMs     | Time % with 16-40 steps recorded/minute | 5.309 [-1.930, 12.55] (0.126)   | 0.125 | 0.907 |
| 27        | M            | VDMs     | Time % with 41+ steps recorded/minute   | 0.231 [-9.796, 10.26] (0.943)   | 0.000 | 0.893 |
| 28        | M            | VDMs     | Max 60                                  | 3.609 [-1.051, 8.269] (0.112)   | 0.059 | 0.894 |
| 29        | M            | VDMs     | Max 20                                  | 2.096 [-1.929, 6.121] (0.228)   | 0.020 | 0.873 |
| 30        | M            | VDMs     | Max 5                                   | 4.986 [1.805, 8.167] (0.003)    | 0.134 | 0.857 |
| 31        | M            | VDMs     | Max 1                                   | 6.062 [3.141, 8.984] (0.000)    | 0.201 | 0.873 |
| 32        | M            | VDMs     | Peak performance index                  | 4.298 [-1.822, 10.42] (0.105)   | 0.114 | 0.849 |

AG -- ActiGraph device; IDMs -- investigator-derived daily measures; CI -- estimate's confidence interval obtained from LMM estimation; est. -- estimate obtained from LMM estimation; Model no. -- model number: ordering index of a LMM fit, assigned to a particular daily measure; R2c - LMM conditional coefficient of determination; R2m -- LMM marginal coefficient of determination; M -- Modus device; Max (60,20,5,1) -- maximum consecutive cadence during (60,20,5,1) minutes; PA -- physical activity; PPI -- peak performance index (mean cadence of the day's most intensive, non-contiguous 30 minutes); ROADS -- Rasch-built Overall ALS Disability Scale; VDMs -- vendor-provided daily measures

\* Daily measure slopes have been standardized to have means of zero and units in standard deviations.

## Supplementary Table 4

Average baseline and monthly change in investigator-derived total activity counts across 9 different data collection scenarios

| Time span of data included | No. of data points | Baseline est. [95% CI]     | Baseline est. % change | Monthly change est. [95% CI] (p-val.) | Monthly change est. % change |
|----------------------------|--------------------|----------------------------|------------------------|---------------------------------------|------------------------------|
| All wD                     | 2821               | 1362438 [1059453, 1665100] |                        | -58631 [-99870, -16735] (0.012)       |                              |
| 2wD+2wB                    | 1480               | 1365618 [1062850, 1668039] | 0.2%                   | -60004 [-99344, -20021] (0.007)       | 2.3%                         |
| 2wD+4wB                    | 1030               | 1369841 [1063604, 1675745] | 0.5%                   | -60904 [-101906, -19606] (0.009)      | 3.9%                         |
| 2wD+6wB                    | 839                | 1370795 [1067516, 1673669] | 0.6%                   | -59797 [-100155, -19086] (0.009)      | 2.0%                         |
| 2wD+8wB                    | 690                | 1378268 [1071597, 1684976] | 1.2%                   | -50122 [-94237, -4581] (0.038)        | -14.5%                       |
| 1wD+2wB                    | 982                | 1383447 [1081313, 1685141] | 1.5%                   | -64690 [-106144, -22614] (0.006)      | 10.3%                        |
| 1wD+4wB                    | 616                | 1378843 [1074813, 1682415] | 1.2%                   | -53240 [-96037, -10231] (0.024)       | -9.2%                        |
| 1wD+6wB                    | 446                | 1362648 [1058805, 1666175] | 0.0%                   | -73018 [-117645, -27579] (0.005)      | 24.5%                        |
| 1wD+8wB                    | 357                | 1360927 [1061328, 1660141] | -0.1%                  | -52865 [-100359, -3977] (0.041)       | -9.8%                        |

% change – the percent change in point estimate value as compared with the estimate obtained with the use of all available data ("All wD"); CI - estimate's confidence interval obtained from LMM estimation; est. -- estimate obtained from LMM estimation; No. -- number; p-val. -- estimate's p-value obtained from LMM estimation; wD -- week(s) of data included in the analysis; wB -- weeks of data withheld from the analysis ("break in wearable data collection")
